## Title

Expansion history and environmental suitability shape effective population size in a plant invasion

## 5 Authors

Joseph E Braasch\*1

[jbraasch@email.arizona.edu](mailto:jbraasch@email.arizona.edu)

ORCID 0000-0001-7502-1517

10 Brittany S Barker<sup>1</sup>

[Bbarker505@gmail.com](mailto:Bbarker505@gmail.com)

Katrina M Dlugosch<sup>1</sup>

[kdlugoasch@email.arizona.edu](mailto:kdlugoasch@email.arizona.edu)

15

<sup>1</sup>Department of Ecology & Evolutionary Biology, University of Arizona, Tucson, AZ, USA

\*Author for correspondence

PO Box 210088, Tucson, AZ, 85712 / tel: 520-336-7623 / fax: 520-621-9190 /

20 [jbraasch@email.arizona.edu](mailto:jbraasch@email.arizona.edu)

**Keywords** Ecological Genetics, Invasive Species, Contemporary Evolution, Effective  
25 Population Size, RAD-Seq

**Running Title** Range expansion and effective population size

**Article Type** Original Article

**Main text words** 5078

30

35

## Abstract

40

The margins of an expanding range are predicted to be challenging environments for adaptation.

Marginal populations should often experience low effective population sizes ( $N_e$ ) where genetic drift is high due to demographic expansion and/or census population size is low due to

unfavorable environmental conditions. Nevertheless, invasive species demonstrate increasing

45 evidence of rapid evolution and potential adaptation to novel environments encountered during

colonization, calling into question whether significant reductions in  $N_e$  are realized during range

expansions in nature. Here we report one of the first empirical tests of the joint effects of

expansion dynamics and environment on effective population size variation during invasive

range expansion. We estimate contemporary values of  $N_e$  using rates of linkage disequilibrium

50 among genome-wide markers within introduced populations of the highly invasive plant

*Centaurea solstitialis* (yellow starthistle) in North America (California, USA), as well as in

native European populations. As predicted, we find that  $N_e$  within the invasion is positively

correlated with both expansion history (time since founding) and habitat quality (abiotic

climate). History and environment had independent additive effects with similar effect sizes,

55 supporting an important role of both factors in this invasion. These results support theoretical

expectations for the population genetics of range expansion, though whether these processes can

ultimately arrest the spread of an invasive species remains an open question.

60

## Introduction

65           Adaptation is expected to be a critical component of how species respond to novel  
environmental conditions, such as those encountered during colonization and range expansion  
[\(Mayr 1963; Kirkpatrick & Barton 1997; Griffith & Watson 2006; Colautti & Barrett 2013; Bock  
et al. 2015; Hamilton et al. 2015\)](#). At the same time, it has been suggested that colonizing species  
might often experience small population sizes that limit the ability of founding populations to  
70           respond to natural selection [\(Elam et al. 2007; Dlugosch et al. 2015b; Welles & Dlugosch 2018\)](#).  
Small population sizes could result from both founder events and maladaptation to novel  
environments. A failure to adapt under these conditions could slow or limit range expansion and  
contribute to the formation of range limits [\(Bridle & Vines 2007; Eckert et al. 2008; Sexton et al.  
2009\)](#). These effects are currently an active area of theoretical and experimental research [\(Gilbert  
75           et al. 2017; Szűcs et al. 2017a; Szűcs et al. 2017b\)](#), but there is little empirical information about  
the dynamics of population size and its influence on evolution during ongoing range expansions  
in the wild [\(Ramakrishnan et al. 2010; Wootton and Pfister 2015\)](#).

          Population genetic models predict that adaptation can fail during range expansion due to  
the strong effects of genetic drift during colonization [\(Lehe et al. 2012; Peischl et al. 2013;  
80           Peischl et al. 2015\)](#). Range expansions are expected to involve a series of founding events,  
resulting in reduced effective population size ( $N_e$ ) and increased sampling effects as the range  
boundary advances [\(Le Corre & Kremer 1998; Excoffier 2004; Slatkin & Excoffier 2012\)](#). In  
particular, low  $N_e$  at the leading edge can cause random alleles, including deleterious mutations,  
to ‘surf’ to high frequency regardless of patterns of selection [\(Hallatschek et al. 2007; Excoffier  
85           and Ray 2008; Excoffier et al. 2009; Moreau et al. 2011\)](#). This can create an ‘expansion load’ of  
deleterious alleles at the wave front, but it is also possible that beneficial mutations can surf to

high frequency and aid in local adaptation ([Lehe et al. 2012](#); [Peischl et al. 2013](#); [Peischl et al. 2015](#)). The effects of range expansion on adaptation have been empirically observed with greatest detail in bacterial culture, where manipulative experiments have shown that the strength of genetic drift is key to determining whether allele surfing promotes or hinders adaptation ([Hallatschek & Nelson 2010](#); [Gralka et al. 2016](#)).

Ecological conditions should also shape  $N_e$  during range expansion via their impact on population (census) size and demography. If leading edge environments are novel relative to those experienced by source populations, then founding genotypes will not be pre-adapted and are likely to experience lower absolute fitness. When populations are at relatively low abundance and/or fluctuate in size due to unfavorable conditions,  $N_e$  will be reduced relative to larger or more stable populations ([Wright 1938](#); [Crow & Morton 1955](#); [Kimura & Crow 1963](#); [Frankham 1996](#)). In a rare empirical example, [Micheletti & Storfer \(2015\)](#) found that streamside salamander (*Ambystoma barbouri*) populations on the periphery of the range were also on the margins of their climatic niche and tended toward lower  $N_e$ . Similarly, peripheral populations of North American *Arabidopsis lyrata* possess greater genetic load and appear to exist at their ecological, and perhaps evolutionary limits ([Willi et al. 2018](#)). These studies address a set of long-debated hypotheses proposing that range limits form in part because they include ecologically and/or genetically marginal populations ([Kirkpatrick & Barton 1997](#); [Phillips 2012](#); [Chuang & Peterson 2016](#)), which fail to support local adaptation and further expansion (i.e. the ‘central-marginal’, ‘center-periphery’ and ‘abundant center’ hypotheses: [Sagarin and Gaines 2002](#); [Eckert et al. 2008](#); [Pironon et al. 2015](#)). Importantly, all the above hypotheses share the prediction that colonization will be associated with reduced response to selection for ecological reasons independent of any population genetic effects of range expansion itself. The relative

110 importance of these two factors (ecology and expansion) for shaping  $N_e$  at range margins is  
unknown, but both have the potential to reduce opportunities for local adaptation.

Although  $N_e$  has long been used as a fundamental measure of the scale of genetic drift in  
populations ([Wright 1931](#); [Robertson 1960](#); [Kimura and Crow 1963](#); [Kimura 1964](#); [Ohta 1992](#);  
[Charlesworth 2009](#)), there is surprisingly little known about how  $N_e$  changes during the process of  
115 range expansion. Most empirical population-level estimates come from the field of conservation  
genetics, where  $N_e$  is used to infer the potential for genetic drift to exacerbate the decline of  
threatened populations ([Lynch et al. 1995](#); [Frankham 1996](#); [Sung et al. 2012](#)). These studies have  
demonstrated that  $N_e$  can be highly variable within species, sensitive to local demography and  
modes of reproduction, and captured only in part by measures of census size ([Frankham 1995](#);  
120 [Palstra and Ruzzante 2008](#)). For example, in recovering Chinook salmon (*Orcorhynchus*  
*tshawytscha*) populations, [Shrimpton and Heath \(2003\)](#) found up to a three-fold difference in  
both  $N_e$  and its ratio with census size across spawning sites. While low  $N_e$  is generally expected in  
declining populations, many of the same demographic factors are likely to affect  $N_e$  in founding  
populations ([Colautti et al. 2017](#)).

125 Despite the potential obstacle low  $N_e$  might pose to adaptation, many species -- including  
large numbers of invaders -- have been successful at colonization and show evidence of adaptive  
evolution during range expansion ([Rice and Mack 1991](#); [Dlugosch and Parker 2008](#); [Linnen et](#)  
[al. 2009](#); [Colautti and Barrett 2013](#); [Vandepitte et al. 2014](#); [Colautti and Lau 2015](#); [Li et al.](#)  
[2015](#)). At the same time, detailed studies of range expansion have found some evidence of serial  
130 founding events and associated increases in genetic drift ([Ramakrishnan et al. 2010](#); [Graciá et al.](#)  
[2013](#); [White et al. 2013](#); [Pierce et al. 2014](#)), and it is notable that few invasions have been  
convincingly shown to have expanded beyond the fundamental niches of their native range

([Petitpierre et al. 2012](#); [Tingley et al. 2014](#)). Taken together, it appears that adaptive evolution might be achievable in many invading species, but that perhaps expansion load and ecological mismatch may act, either independently or in concert, to prevent further expansion under some conditions. An understanding of how founding dynamics and marginal environments have shaped  $N_e$  in individual wave front populations is needed to connect theoretical expectations to these observed patterns of successful range expansion.

Here we estimate contemporary  $N_e$  for populations of the obligately outcrossing annual plant *Centaurea solstitialis* (yellow starthistle) across its invasion of California (USA) and its native range in Eurasia. In California, *C. solstitialis* was initially introduced in the mid 19th century into the San Francisco Bay area as a contaminant of alfalfa seed ([Gerlach 1997](#); [DiTomaso et al. 2006](#)). By the mid 20th century, the species was rapidly expanding through California's Central Valley and Sierra Nevada foothill grasslands, and the current leading edge of this invasion lies above 4000 m in elevation along the west side of the Sierra Nevada Mountains ([Pitcairn et al. 2006](#)). During this history of invasion, *C. solstitialis* has crossed climatic environmental gradients that are largely independent in direction from the pathway of colonization (Fig. 1), allowing us to quantify the influence of both climate and expansion history on estimates of  $N_e$  across populations.

We used Restriction-site Associated DNA sequencing (RADseq) to estimate contemporary  $N_e$  in *C. solstitialis* populations sampled at a single time point. In addition to testing for the joint influence of expansion dynamics and ecological conditions on  $N_e$  in this system, we explored solutions for general problems associated with using large genome-wide marker data sets like this to estimate  $N_e$ . Linkage disequilibrium  $N_e$  (LD- $N_e$ ) is a powerful method for inferring contemporary  $N_e$  from single time sampled data, and does so by utilizing the

frequency of statistical linkage across loci ([Waples and Do 2008](#); [Gilbert and Whitlock 2015](#)).

This method requires that loci segregate independently of each other, and while RADseq is widely used to produce population genetic datasets in non-model systems ([Narum et al. 2013](#); [Catchen et al. 2017](#)), it is likely to violate this assumption of independence, resulting in biased

160 calculations of  $N_e$ .

We used marker resampling and rarefaction approaches to improve inferences of variation in  $N_e$  across populations. We tested for effects of expansion history (time since founding) and habitat quality (climatic variables) on rarified  $N_e$  estimates, and compared these values to those from populations in the native range. We also explored the ability of genetic

165 diversity measures to predict values of  $N_e$ , given that non-equilibrium population dynamics may in the short term decouple contemporary  $N_e$  from its expected long term effects on genetic variation (e.g. [Nei et al. 1975](#); [Varvio et al. 1986](#); [Alcala et al. 2013](#); [Epps and Keyghobadi 2015](#)). Together these analyses shed light on the factors shaping the fundamental parameters of evolution during colonization and range expansion.

170

## Materials and Methods

### *Genomic Data*

Genome-wide markers for *C. solstitialis* in this study were sampled from single nucleotide polymorphisms in double-digest RADseq (ddRADseq; ([Peterson et al. 2012](#)),

175 previously published by Barker and colleagues ([Barker et al. 2017](#); Dryad

doi:10.5061/dryad.pf550). All sequences were obtained from *C. solstitialis* individuals germinated in the laboratory from wild collected seed. Seeds were sampled in 2008 from maternal plants along a linear transect in each population, with >1m separation between

*Braasch et al. – Range expansion and effective population size*

individuals. Populations included at least 13 individuals each grown from different maternal  
180 plants, from 12 invading populations in California and 7 native populations in Europe (451  
individuals total; Table S1).

Briefly, sequence data published by Barker and colleagues (2017) were generated as  
follows. Genomic DNA was extracted with a modified CTAB protocol ([Webb and Knapp 1990](#))  
and fragmented using *PstI* and *MseI* restriction enzymes. Samples were individually barcoded,  
185 cleaned and size selected for fragments between 350 and 650 bp. Size selected fragments were  
amplified through 12 PCR cycles and sequenced on an Illumina HiSeq 2000 or 2500 platform  
(Illumina, Inc., San Diego, CA USA) to generate 100 bp paired-end reads. Reads were de-  
multiplexed with custom scripts and cleaned with the package SNOWHITE 2.0.2 ([Dlugosch et  
al. 2013](#)) to remove primer and adapter contaminants. Barcode and enzyme recognition  
190 sequences were removed from individual reads, and bases with phred quality scores below 20  
were clipped from the 3' end. Reads were trimmed to a uniform length of 76 base pairs. The R2  
(reverse) reads from the data set were removed due to variable quality, and all analyses in this  
study were conducted using R1 (forward) reads only.

We used the `denovo_map.pl` pipeline in STACKS 1.20 ([Catchen et al. 2011](#); [Hohenlohe  
195 et al. 2011](#)) to identify putative alleles within individuals, allowing a maximum of two nucleotide  
polymorphisms when merging reads (`-M` parameter in STACKS) a maximum of two alleles per  
locus (`-X`), and a minimum coverage depth of 5 (`-m`). A catalog of loci and single nucleotide  
polymorphisms (SNPs) was generated across individuals, allowing two polymorphisms (`-n`)  
between individuals within a stack. The `population.pl` module in STACKS was used to calculate  
200 the population level nucleotide diversity ( $\pi$ ) ([Nei & Li 1979](#); [Allendorf 1986](#)). We restricted our



analyses to those loci that were sequenced in 80% of individuals within a population and 90% of all populations (-r and -p parameters respectively).

### *Estimates of $N_e$*

205 We used SNPs identified by STACKs to calculate  $N_e$  for each population using a method based on linkage disequilibrium among loci with a correction for missing data ([Waples & Do 2008](#)) implemented in the program NeEstimator v.2.01 ([Do et al. 2014](#)). This method derives estimates of  $N_e$  from the frequency of statistical linkage among loci and has been shown to be one of the best predictors of  $N_e$  (hereafter LD- $N_e$ ) for markers sampled at a single time point  
210 ([Gilbert & Whitlock 2015](#); [Wang 2016](#); [Waples 2016](#)). The LD- $N_e$  method is not strongly influenced by the total genetic diversity in the sample ([Charlesworth 2009](#); [Do et al. 2014](#)), making it particularly well suited to analyses of invading populations where low genetic diversity might arise from founder effects unrelated to the number of individuals currently reproducing in the population. We used a minimum allele frequency threshold of 0.05 for  
215 including a locus in the analyses, which was the lowest threshold that did not result in excessive loss of loci and infinite estimates of  $N_e$  at some study sites.

The ddRADseq data yielded thousands of SNPs across the genome, 622 of which passed our screening requirements (see Results). Some of these loci were located in the same RAD 76bp sequence, and we expect that these and many others do not segregate independently in our data  
220 set, either due to physical proximity or the influence of selection on multi-locus allele combinations (*C. solstitialis* has a genome size of 850Mbp, distributed across 8 chromosomes ([Bancheva & Greilhuber 2005](#); [Widmer et al. 2007](#))). To increase the likelihood of basing our

estimates on independent loci, we re-sampled random sets of 20 polymorphic SNPs from unique sequences to obtain distributions of LD- $N_e$  estimates for each population. Each population was  
225 resampled 30,000 times. Sampling distributions were generally lognormal (Supporting Information Fig. S1), and we used medians to identify the peak estimate.

We observed a strong, positive effect of the number of individuals sampled in each population on median LD- $N_e$  ( $F_{1,17}=9.36$ ,  $P=0.007$ ). Unequal sampling has been shown to decrease the accuracy of LD- $N_e$  estimates ([England et al. 2006](#); [Authors](#)), and NeEstimator implements a  
230 corrective algorithm to address this problem ([Do et al. 2014](#)). To account for persistent sampling effects we produced rarefaction curves of median  $N_e$  estimated by subsampling different numbers of individuals (10 to the maximum number available per population) after marker resampling. As above, each marker resampling consisted of 30,000  $N_e$  estimates with 20 loci. Median estimates did not asymptote at our maximum sampling effort and increased linearly (see Results). We fit a  
235 linear mixed model with random intercept and slopes implemented in the Lme4 package in R ([Bates et al. 2014](#)) to obtain population specific functions which describe the relationships between the number of individuals sampled in each population and median LD- $N_e$  values. The estimated slope and intercepts for each population were extracted from the model and used to calculate rarefied  $N_e$  for each population at a standard value of 10 individuals. We explored the  
240 relationship between rarefied  $N_e$  and measures of genome-wide marker variation using nucleotide diversity ( $\pi$ ) at variable sites, as calculated in STACKS. We used linear regression to predict nucleotide diversity from  $N_e$  within geographic region (invading California populations or native European populations).

245 *Effects of Expansion History and Environment on  $N_e$*

We tested for an effect of population age since founding on the rarefied  $N_e$  of invading populations. We estimated the date of colonization for each population by searching the Jepson Online Herbarium (<http://ucjeps.berkeley.edu/>) for records of *C. solstitialis* in California since its first record in 1869. For each sampling location, we used the earliest date on record for the county, or for an adjacent county when the sampling location was closer to older collection records there. These dates were subtracted from the year of our seed collections (2008) to produce values of population age used in subsequent analyses. Using herbaria records to assign population ages in this manner may not represent the true population age because of the time between population founding and the first records of the population. Nevertheless, *C. solstitialis* has a relatively well-documented invasion history in California (858 specimens on record, 577 records with GPS data, 61 records prior to 1930 in the Jepson Herbarium), and our population age estimates are in line with historical reconstructions of a general pattern of expansion out from initial establishment in the San Francisco Bay area first to the Central Valley and then to the North, East, and South ([Gerlach 1997](#); [DiTomaso et al. 2006](#); [Pitcairn et al. 2006](#)).

We also tested for the influence of the climatic environment on rarefied  $N_e$  in both invading and native populations. To quantify the climatic gradients that might be most relevant to *C. solstitialis* ecology, we used the first two principal component (PC) axes of climatic variation across *C. solstitialis* collection sites in North America and Europe, as previously identified by Dlugosch and colleagues (2015a; Fig. 1). Climatic variables at 18.5 x 18.5 km resolution ([Kriticos et al. 2012](#)) were extracted for each site using ArcGIS. Larger values along the first PC climate axis generally indicate sites with higher temperatures and lower seasonality in total radiation. Larger PC2 values indicate lower annual precipitation and greater seasonality in temperature. Greater seasonal variation in temperature has been shown to be related to

ecologically important traits (plant size and drought tolerance) in *C. solstitialis* in both the native  
270 and invaded ranges ([Dlugosch et al. 2015a](#)).

To quantify the contributions of both population age and climatic environment to  
variation in rarified  $N_e$  for the invaded range, we used a general linear model with  $N_e$  as the  
dependent variable and population age, climate PC1, climate PC2, and their interactions as  
explanatory variables. We constructed a separate model of rarified  $N_e$  in native range populations  
275 using only PC1 and PC2 as variables, since no information about population age is available for  
the native range. We used model decomposition and F-scores to identify the best fit model. To  
explore the relative effect of each variable and their interactions on  $N_e$ , effect sizes were  
calculated as partial eta-squared values, which partition the total variance in a dependent variable  
among all independent variables (analogous to  $R^2$  in multiple regression), using the best fit linear  
280 model with the function ‘etasq’ in the R package ‘heplots’ version 1.3-1 ([Fox et al. 2008](#)). We  
also tested for an overall difference in the rarified  $N_e$  of invading and native populations using a  
Wilcoxon signed-rank test and a Monte Carlo exact test implemented with the coin package in R  
([Hothorn et al. 2006](#)).

## 285 **Results**

We obtained a dataset of 622 SNPs from our filtering pipeline which were used to  
estimate  $N_e$ . For each population, subsampling produced a wide range of estimates of LD- $N_e$ ,  
contingent upon which 20 loci were sampled (Supporting Information Fig. S1). These  
distributions spanned at least 4 orders of magnitude for every population. Distributions peaked  
290 strongly around median estimates (Supporting Information Fig. S1). Median estimates of LD- $N_e$   
prior to rarefaction varied from 19.5 to 38.5 across the California invasion (Supporting

Information Table S1). In general, estimates were higher in central and northern California and decreased to the East and South (Fig. 1). In native populations, median  $N_e$  estimates ranged from 16.2 to 42.7, with the three populations with lowest LD- $N_e$  located on the western side of the  
295 range in Spain (Fig. 1).

We found a strong association between median LD- $N_e$  and the number of individuals sampled from a population ( $r^2_{\text{adj}}=0.32$ ,  $F_{1,17}=9.36$ ,  $P=0.007$ ). Rarefaction sampling produced positive relationships between LD- $N_e$  and the number of individuals resampled within each population (Fig. 2). Slopes ranged from  $\sim 0.11$  to 1.19. Importantly, rarefaction removed the  
300 significant effect of sampling effort on  $N_e$  values (rarefied  $N_e$  vs. total sample size;  $r^2_{\text{adj}}=.12$ ,  $F_{1,17}=3.47$ ,  $P=0.08$ ).

Both climate and population age predicted rarified  $N_e$  in invading populations. The best fit linear model ( $r^2_{\text{adj}}=0.46$ ,  $F_{(4,8)}=4.09$ ,  $P=0.0493$ ) included significant, additive effects of population age and PC2 (Fig. 3; Table 1). Population age and PC2 were both positively correlated with  
305 rarified  $N_e$  values, indicating that  $N_e$  is largest in older populations and habitats with more temperature seasonality and lower precipitation. PC2 had a greater influence on rarified  $N_e$  values than age, based its larger effect size (Table 1), although this difference was small. In contrast, rarified  $N_e$  of native range populations was not predicted by either climatic PC variable (Full model:  $r^2_{\text{adj}}=0.2314$ ,  $F_{2,4}=1.90$ ,  $P=0.23$ ) (Interactions: PC1:  $P=0.13$ , PC2:  $P=0.20$ ).

310 Invading populations included a narrower range of rarified  $N_e$  values, nested within the distribution observed for native populations (Supporting Information Fig S2), and there was no significant difference between rarified  $N_e$  values in the native and invading ranges (Wilcoxon signed rank test:  $W = 43$ ,  $P = 0.97$ ; Monte-Carlo one-way exact test:  $P = 0.93$ ). Nucleotide diversity ( $\pi$ ) also did not differ overall between the native and invaded ranges (Model:  $r^2_{\text{adj}}=0.-$

315 0.04,  $F_{(3,15)}=0.78$ ,  $P=0.55$ ; region term:  $t_{(2,15)}=-1.5$ ,  $P=0.15$  ). There was no significant relationship between  $\pi$  and  $N_e$  in invaded range populations ( $r^2_{\text{adj}}=-0.037$ ,  $F_{(1,10)}=0.59$ ,  $P=0.46$ ) and there was a positive, marginally significant relationship between nucleotide diversity and  $N_e$  in native range populations ( $r^2_{\text{adj}}=0.43$ ,  $F_{(1,5)}=5.45$ ,  $P=0.067$ ), despite a smaller sample size in this range (Supporting Information Fig S3).

320

## Discussion

Here we report some of the first empirical evidence for the joint effects of both range expansion and climatic environment on contemporary  $N_e$  in natural populations. We produced rarified estimates of LD- $N_e$  across 12 populations in the invaded range of *C. solstitialis* and found  
325 a significant positive relationship between population age and  $N_e$ , a finding in line with theoretical expectations for the population genetics of expanding populations ([Hallatschek et al. 2007](#); [Excoffier & Ray 2008](#); [Excoffier et al. 2009](#); [Moreau et al. 2011](#); [Lehe et al. 2012](#); [Peischl et al. 2013](#); [Peischl et al. 2015](#)). We also find evidence that spatial variation in ecological conditions, specifically climate in our study, has a significant impact on  $N_e$  which is independent  
330 of population age. These effects of range expansion and climate were similar in magnitude, suggesting that both of these factors are likely to be important for shaping evolutionary outcomes in invading populations.

We emphasize that our rarified LD- $N_e$  values do not reflect a ‘true’  $N_e$  value for the populations in our study. Rather, rarified estimates here represent *relative* values of  $N_e$ , and are  
335 thus useful for comparisons among populations. We expect asymptotic LD- $N_e$  values for these populations to be larger, because we observed no asymptote with rarefaction for any of the populations in our study. Despite this, our estimates are similar to values reported in other plant  
*Braasch et al. – Range expansion and effective population size*

and animal species using the same approach (e.g. [Shrimpton & Heath 2003](#); [Coyer et al. 2008](#); [Wang et al. 2013](#); [Álvarez et al. 2015](#)). The LD- $N_e$  estimation method itself also has a tendency  
340 to underestimate known values of  $N_e$  in simulations ([Gilbert & Whitlock 2015](#))

We found that subsampling of loci was important for using a genome-wide marker dataset to estimate LD- $N_e$ . Simulation studies of LD- $N_e$  typically use on the order of 20 loci ([England et al. 2006](#); [Waples 2006](#) ; [Waples & Do 2008](#); [Gilbert & Whitlock 2015](#)). Our resampling of 20 loci revealed that  $N_e$  estimates in *C. solstitialis* vary by at least 4 orders of  
345 magnitude when different sets of loci are used. This variation is expected given that particular sets of loci will capture different effects of physical linkage, history of selection, and chance sampling effects ([Daly et al. 2001](#); [Remington et al. 2001](#); [Flint-Garcia et al. 2003](#)). Resampling allowed us to leverage many combinations of loci across the genome to identify a well defined peak in the distribution of estimates. A resampling approach is likely to be generally useful for  
350 RAD-seq and other popular genome wide marker methods, particularly where a complete reference genome is not available to control for the physical arrangement of loci.

After accounting for these methodological issues, we found a significant effect of population age on differences in  $N_e$  across populations. Rarefied  $N_e$  estimates were lower in younger populations, which fits with expectations that a subset of individuals will contribute to  
355 range expansion ([Excoffier & Ray 2008](#)) and that genetic drift will be larger at the leading edge ([Lehe et al. 2012](#); [Peischl et al. 2013](#); [Peischl et al. 2015](#)). Estimates of contemporary  $N_e$  from our invading populations are within the distribution that we observe from native populations, suggesting that this species did not experience a large initial genetic bottleneck during introduction to the New World, nor exceptionally low  $N_e$  during range expansion (relative to  
360 values observed in native populations). This lack of evidence for a strong genetic bottleneck is in

line with models of historical demography by Barker and colleagues (2017), who inferred little reduction in population size and maintenance of genetic diversity during the colonization of the Americas by *C. solstitialis*. In general, introduced species often lack strong genetic bottlenecks (Dlugosch & Parker 2008; Uller & Leimu 2011; Dlugosch et al. 2015b), and our results here  
365 demonstrate that species which avoid genetic bottlenecks during introduction may still experience declines in  $N_e$  at the leading edge of range expansion. Importantly, invading populations of *C. solstitialis* are an order of magnitude higher in density than native populations (Uygur et al. 2004; Andonian et al. 2011), indicating that the fraction of the census population that is contributing to evolutionary dynamics in the invasion is much lower than in the native  
370 range.

We also observed an independent positive relationship between climatic PC2 and  $N_e$  of invading *C. solstitialis* populations, consistent with an impact of habitat suitability on  $N_e$ . High PC2 values reflect greater variation in seasonal temperatures and lower total annual precipitation, which typify areas of especially high *C. solstitialis* density in California (Dlugosch et al. 2015a).  
375 Previous studies in this system have proposed that *C. solstitialis* success stems from a lack of effective competitors in more drought prone habitats (Dlugosch et al. 2015a), due in part to the extensive conversion of these habitats to rangeland (Menke 1989, (Stromberg & Griffin 1996)). These patterns of *C. solstitialis* density can be counterintuitive, as studies within the California invasion have found that water availability (both naturally occurring and experimentally  
380 manipulated) is strongly and positively correlated with *C. solstitialis* density and fecundity (Enloe et al. 2004; Morghan & Rice 2006; Hulvey & Zavaleta 2012; Eskelinen & Harrison 2014), suggesting that fitness should be highest in wetter areas. Our results are most consistent with the landscape pattern of abundant *C. solstitialis* in drier areas, and might therefore reflect



differences in human land use and the availability of native competitors across the invaded  
385 range. An underlying relationship between  $N_e$  and land use in the invasion could also explain  
why we did not find a relationship with climate in the native range, where other features might  
shape habitat suitability for this species.

These differences in rarified  $N_e$  among invading populations were not predicted by  
sequence diversity ( $\pi$ ). Nonequilibrium populations such as the invasions here are unlikely to  
390 have had sufficient time to reach equilibrium diversity at a given  $N_e$ , and will also have been  
changing in size over time ([Nei et al. 1975](#); [Alcala et al. 2013](#); [Epps & Keyghobadi 2015](#)).  
Notably, we did find a marginally significant positive relationship between  $\pi$  and  $N_e$  in native  
range populations, which will have had more time to stabilize in population size and reach  
mutation-drift equilibrium. Moreover, rare alleles contribute important equilibrium genetic  
395 variation ([Luikart et al. 1998](#)) and native *C. solstitialis* populations have been previously shown  
to harbor more rare alleles than invading populations in North America ([Barker et al. 2017](#)).  
There is also a tendency for RAD-seq to underestimate  $\pi$  in more diverse genomes ([Arnold et al.](#)  
[2013](#); [Cariou et al. 2016](#)), although given the loss of rare alleles from invading populations, we  
might expect this to affect native populations more strongly than invading populations.

400 Our results support the prediction that both range expansion and habitat quality can  
increase the genetic drift experienced by leading edge populations. There is particular interest in  
whether these effects can hinder adaptation, slow further colonization, and establish static range  
boundaries ([Bosshard et al. 2017](#); [Lehe et al. 2012](#); [Peischl et al. 2013](#); [Peischl et al. 2015](#);  
[Marculis et al. 2017](#); [Birzu et al. 2018](#)). Recent studies have demonstrated a link between  
405 differences in historical values of  $N_e$  and differences in efficacy of selection across species (e.g.  
[Slotte et al. 2010](#); [Jensen & Bachtrog 2011](#); [Strasburg et al. 2011](#)), and both theoretical and

experimental studies of bacteria have shown that the process of range expansion can reduce contemporary  $N_e$  and impose limits to adaptation and further colonization at the expansion front ([Hallatschek & Nelson 2010](#); [Lehe et al. 2012](#); [Gralka et al. 2016](#); [Peischl et al. 2013](#); [Peischl et al. 2015](#)). Natural populations of *Arabidopsis lyrata* have been shown to demonstrate some of these effects, with greater genetic load in range edge populations associated with a lack of adaptation along an environmental cline ([Willi et al. 2018](#)). Limits to range expansion are expected to be sensitive to the specifics of evolutionary parameters in natural populations, including the magnitudes of  $N_e$  and selection, the amount and scale of gene flow across the expansion, and the genetic architecture of adaptive variation ([Hallatschek & Nelson 2010](#); [Lehe et al. 2012](#); [Peischl et al. 2013](#); [Peischl et al. 2015](#); [Gralka et al. 2016](#)).

The expansion ecology of *C. solstitialis* does not support the existence of maladapted edge populations. Populations of *C. solstitialis* closer to the range edge can achieve greater density than more interior populations in some cases ([Swope et al. 2017](#)), which runs counter to any expectations of high genetic load. Additionally, evolution of increased growth and earlier flowering appears to be enhancing the invasiveness of *C. solstitialis* ([Dlugosch et al. 2015a](#)), suggesting that reduced  $N_e$  at the range edge has not created a barrier to adaptation and further expansion. On the other hand, in areas where we would expect adaptation to be particularly critical for colonization, such as stressful serpentine soil habitats in California, *C. solstitialis* is notably rare or absent ([Dukes 2002](#); [Gelbard & Harrison 2003](#)), though this might simply reflect the absence of relevant adaptive genetic variation. The availability of adaptive variation and the degree to which this is a limiting factor in species invasions is an active area of debate ([Ellstrand & Schierenbeck 2000](#); [Rius & Darling 2014](#); [Bock et al. 2015](#)), and should be particularly relevant to the colonization of habitats requiring significant niche evolution. The results reported

430 here emphasize that an understanding of the evolutionary mechanisms that generate boundaries  
to range expansion in natural populations will require evaluating evidence not only for  
availability of adaptive variation ([Dlugosch et al. 2015a](#)), but also for an effective response to  
selection.

## 435 References

- Alcala, N., Streit, D., Goudet, J., & Vuilleumier, S. (2013). Peak and persistent excess of genetic diversity following an abrupt migration increase. *Genetics*, **193**(3), 953–971.
- Allendorf, F. W. (1986). Genetic drift and the loss of alleles versus heterozygosity. *Zoo Biology*, **5**(2), 181–190.
- 440 Álvarez, D., Lourenço, A., Oro, D., & Velo-Antón, G. (2015). Assessment of census (N) and effective population size (Ne) reveals consistency of Ne single-sample estimators and a high Ne/N ratio in an urban and isolated population of fire salamanders. *Conservation Genetics Resources*, **7**(3), 705–712.
- Andonian, K., Hierro, J. L., Khetsuriani, L., Becerra, P., Janoyan, G., Villarreal, D., ... Callaway, R. M. (2011). Range-expanding populations of a globally introduced weed experience negative plant-soil  
445 feedbacks. *PLoS One*, **6**(5), e20117.
- Arnold, B., Corbett-Detig, R. B., Hartl, D., & Bomblies, K. (2013). RAD seq underestimates diversity and introduces genealogical biases due to nonrandom haplotype sampling. *Molecular Ecology*, **22**(11), 3179–3190.
- Atwater, D. Z., Ervine, C., & Barney, J. N. (2018). Climatic niche shifts are common in introduced plants.  
450 *Nature Ecology & Evolution*, **2**(1), 34–43.
- Bancheva, S., & Greilhuber, J. (2006). Genome size in Bulgarian *Centaurea s.l.* (Asteraceae). *Plant Systematics and Evolution*, **257**(1), 95–117.
- Barker, B. S., Andonian, K., Swope, S. M., Luster, D. G., & Dlugosch, K. M. (2017). Population genomic analyses reveal a history of range expansion and trait evolution across the native and invaded range  
455 of yellow starthistle (*Centaurea solstitialis*). *Molecular Ecology*, **26**(4), 1131–1147.
- Bates, D., Maechler, M., Bolker, B., & Walker, S. (2015). Fitting Linear Mixed-Effects Models Using lme4. *Journal of Statistical Software*, **67**(1), 1–48. <http://doi:10.18637/jss.v067.i01>
- Birzu, G., Hallatschek, O., & Korolev, K. S. (2018).. *Proceedings of the National Academy of Sciences of the United States of America*, **115**(16), E3645–E3654.
- 460 Bock, D. G., Caseys, C., Cousens, R. D., Hahn, M. A., Heredia, S. M., Hübner, S., ... Rieseberg, L. H. (2015). What we still don't know about invasion genetics. *Molecular Ecology*, **24**(9), 2277–2297.
- Bosshard, L., Dupanloup, I., Tenailon, O., Bruggmann, R., Ackermann, M., Peischl, S., & Excoffier, L. (2017). Accumulation of Deleterious Mutations During Bacterial Range Expansions. *Genetics*, **207**(2), 669–684.
- 465 Cariou, M., Duret, L., & Charlat, S. (2016). How and how much does RAD-seq bias genetic diversity estimates? *BMC Evolutionary Biology*, **16**(1), 240.
- Catchen, J. M., Amores, A., Hohenlohe, P., Cresko, W., & Postlethwait, J. H. (2011). Stacks: building and genotyping Loci de novo from short-read sequences. *G3*, **1**(3), 171–182.
- Catchen, J. M., Hohenlohe, P. A., Bernatchez, L., Funk, W. C., Andrews, K. R., & Allendorf, F. W.  
470 (2017). Unbroken: RADseq remains a powerful tool for understanding the genetics of adaptation in natural populations. *Molecular Ecology Resources*, **17**(3), 362–365.

- Charlesworth, B. (2009). Fundamental concepts in genetics: effective population size and patterns of molecular evolution and variation. *Nature Reviews Genetics*, **10**(3), 195–205.
- 475 Chuang, A., & Peterson, C. R. (2016). Expanding population edges: theories, traits, and trade-offs. *Global Change Biology*, **22**(2), 494–512.
- Colautti, R. I., Alexander, J. M., Dlugosch, K. M., Keller, S. R., & Sultan, S. E. (2017). Invasions and extinctions through the looking glass of evolutionary ecology. *Philosophical Transactions of the Royal Society of London. Series B Biological Sciences*, **372**(1712). <http://doi:10.1098/rstb.2016.0031>
- 480 Colautti, R. I., & Barrett, S. C. H. (2011). Population divergence along lines of genetic variance and covariance in the invasive plant *Lythrum salicaria* in eastern North America. *Evolution*, **65**(9), 2514–2529.
- Colautti, R. I., & Lau, J. A. (2015). Contemporary evolution during invasion: evidence for differentiation, natural selection, and local adaptation. *Molecular Ecology*, **24**(9), 1999–2017.
- 485 Coyer, J. A., Hoarau, G., Sjøtun, K., & Olsen, J. L. (2008). Being abundant is not enough: a decrease in effective population size over eight generations in a Norwegian population of the seaweed, *Fucus serratus*. *Biology Letters*, **4**(6), 755–757.
- Crow, J. F., & Morton, N. E. (1955). Measurement of Gene Frequency Drift in Small Populations. *Evolution*, **9**(2), 202–214.
- 490 Daly, M. J., Rioux, J. D., Schaffner, S. F., Hudson, T. J., & Lander, E. S. (2001). High-resolution haplotype structure in the human genome. *Nature Genetics*, **29**, 229.
- DiTomaso, J. M., Kyser, G. B., & Pitcairn, M. J. (2006). Yellow starthistle management guide. California Invasive Plant Council Berkeley, CA.
- Dlugosch, K. M., Cang, F. A., Barker, B. S., Andonian, K., Swope, S. M., & Rieseberg, L. H. (2015a). Evolution of invasiveness through increased resource use in a vacant niche. *Nature Plants*, **1**. <http://doi:10.1038/nplants.2015.66>
- 495 Dlugosch, K. M., Anderson, S. R., Braasch, J., Cang, F. A., & Gillette, H. D. (2015b). The devil is in the details: genetic variation in introduced populations and its contributions to invasion. *Molecular Ecology*, **24**(9), 2095–2111.
- Dlugosch, K. M., Lai, Z., Bonin, A., Hierro, J., & Rieseberg, L. H. (2013). Allele identification for transcriptome-based population genomics in the invasive plant *Centaurea solstitialis*. *G3*, **3**(2), 359–367.
- 500 Dlugosch, K. M., & Parker, I. M. (2008a). Founding events in species invasions: genetic variation, adaptive evolution, and the role of multiple introductions. *Molecular Ecology*, **17**(1), 431–449.
- Dlugosch, K. M., & Parker, I. M. (2008b). Invading populations of an ornamental shrub show rapid life history evolution despite genetic bottlenecks. *Ecology Letters*, **11**(7), 701–709.
- 505 Do, C., Waples, R. S., Peel, D., Macbeth, G. M., Tillett, B. J., & Ovenden, J. R. (2014). NeEstimator v2: re-implementation of software for the estimation of contemporary effective population size (Ne) from genetic data. *Molecular Ecology Resources*, **14**(1), 209–214.
- Dukes, J. S. (2002). Comparison of the effect of elevated CO<sub>2</sub> on an invasive species (*Centaurea solstitialis*) in monoculture and community settings. *Plant Ecology*, **160**(2), 225–234.
- 510 Eckert, C. G., Samis, K. E., & Loughheed, S. C. (2008). Genetic variation across species' geographical ranges: the central--marginal hypothesis and beyond. *Molecular Ecology*, **17**(5), 1170–1188.
- Elam, D. R., Ridley, C. E., Goodell, K., & Ellstrand, N. C. (2007). Population size and relatedness affect fitness of a self-incompatible invasive plant. *Proceedings of the National Academy of Sciences of the United States of America*, **104**(2), 549–552.
- 515 Ellstrand, N. C., & Schierenbeck, K. A. (2000). Hybridization as a stimulus for the evolution of invasiveness in plants? *Proceedings of the National Academy of Sciences of the United States of America*, **97**(13), 7043–7050.
- England, P. R., Cornuet, J.-M., Berthier, P., Tallmon, D. A., & Luikart, G. (2006). Estimating effective population size from linkage disequilibrium: severe bias in small samples. *Conservation Genetics*, **7**(2), 303.
- 520

- Enloe, S. F., DiTomaso, J. M., Orloff, S. B., & Drake, D. J. (2004). Soil water dynamics differ among rangeland plant communities dominated by yellow starthistle (*Centaurea solstitialis*), annual grasses, or perennial grasses. *Weed Science*, **52**(6), 929–935.
- 525 Epps, C. W., & Keyghobadi, N. (2015). Landscape genetics in a changing world: disentangling historical and contemporary influences and inferring change. *Molecular Ecology*, **24**(24), 6021–6040.
- Eskelinen, A., & Harrison, S. (2014). Exotic plant invasions under enhanced rainfall are constrained by soil nutrients and competition. *Ecology*, **95**(3), 682–692.
- Excoffier, L. (2004). Patterns of DNA sequence diversity and genetic structure after a range expansion: lessons from the infinite-island model. *Molecular Ecology*, **13**(4), 853–864.
- 530 Excoffier, L., & Ray, N. (2008). Surfing during population expansions promotes genetic revolutions and structuration. *Trends in Ecology & Evolution*, **23**(7), 347–351.
- Flint-Garcia, S. A., Thornsberrry, J. M., & Buckler, E. S., 4th. (2003). Structure of linkage disequilibrium in plants. *Annual Review of Plant Biology*, **54**, 357–374.
- 535 Fox, J., Friendly, M., & Monette, G. (2008). Visualizing hypothesis tests in multivariate linear models: the heplots package for R. *Computational Statistics*, **24**(2), 233–246.
- Frankham, R. (1995). Effective population size/adult population size ratios in wildlife: a review. *Genetical Research*, **89**(5-6), 491–503.
- Frankham, R. (1996). Relationship of Genetic Variation to Population Size in Wildlife. *Conservation Biology*, **10**(6), 1500–1508.
- 540 Gelbard, J. L., & Harrison, S. (2003). Roadless habitats as refuges for native grasslands: interactions with soil, aspect, and grazing. *Ecological Applications*, **13**(2), 404–415.
- Gerlach, J. D., Jr. (1997). The introduction, dynamics of geographic range expansion, and ecosystem effects of yellow starthistle (*Centaurea solstitialis*). In Proceedings of the California Weed Science Society (Vol. 49, pp. 136–141).
- 545 Gilbert, K. J., Sharp, N. P., Angert, A. L., Conte, G. L., Draghi, J. A., Guillaume, F., ... Whitlock, M. C. (2017). Local Adaptation Interacts with Expansion Load during Range Expansion: Maladaptation Reduces Expansion Load. *The American Naturalist*, **189**(4), 368–380.
- Gilbert, K. J., & Whitlock, M. C. (2015). Evaluating methods for estimating local effective population size with and without migration. *Evolution*, **69**(8), 2154–2166.
- 550 Graciá, E., Botella, F., Anadón, J. D., Edelaar, P., Harris, D. J., & Giménez, A. (2013). Surfing in tortoises? Empirical signs of genetic structuring owing to range expansion. *Biology Letters*, **9**(3), 20121091.
- Gralka, M., Stiewe, F., Farrell, F., Möbius, W., Waclaw, B., & Hallatschek, O. (2016). Allele surfing promotes microbial adaptation from standing variation. *Ecology Letters*, **19**(8), 889–898.
- 555 Griffith, T. M., & Watson, M. A. (2006). Is evolution necessary for range expansion? Manipulating reproductive timing of a weedy annual transplanted beyond its range. *The American Naturalist*, **167**(2), 153–164.
- Hallatschek, O., Hersen, P., Ramanathan, S., & Nelson, D. R. (2007). Genetic drift at expanding frontiers promotes gene segregation. *Proceedings of the National Academy of Sciences of the United States of America*, **104**(50), 19926–19930.
- 560 Hallatschek, O., & Nelson, D. R. (2010). Life at the front of an expanding population. *Evolution*, **64**(1), 193–206.
- Hamilton, J. A., Okada, M., Korves, T., & Schmitt, J. (2015). The role of climate adaptation in colonization success in *Arabidopsis thaliana*. *Molecular Ecology*, **24**(9), 2253–2263.
- 565 Hohenlohe, P. A., Amish, S. J., Catchen, J. M., Allendorf, F. W., & Luikart, G. (2011). Next-generation RAD sequencing identifies thousands of SNPs for assessing hybridization between rainbow and westslope cutthroat trout. *Molecular Ecology Resources*, **11**(s1), 117–122.
- Hothorn, T., Hornik, K., van de Wiel, M. A., & Zeileis, A. (2006). A Lego System for Conditional Inference. *The American Statistician*, **60**(3), 257–263.
- 570 Hulvey, K. B., & Zavaleta, E. S. (2012). Abundance declines of a native forb have nonlinear impacts on grassland invasion resistance. *Ecology*, **93**(2), 378–388.

- Jensen, J. D., & Bachtrog, D. (2011). Characterizing the influence of effective population size on the rate of adaptation: Gillespie's Darwin domain. *Genome Biology and Evolution*, **3**, 687–701.
- 575 Kimura, M. (1964). Diffusion Models in Population Genetics. *Journal of Applied Probability*, **1**(2), 177–232.
- Kimura, M., & Crow, J. F. (1963). The Measurement of Effective Population Number. *Evolution*, **17**(3), 279–288.
- Kirkpatrick, M., & Barton, N. H. (1997). Evolution of a species' range. *The American Naturalist*, **150**(1), 1–23.
- 580 Kriticos, D. J., Webber, B. L., Leriche, A., Ota, N., Macadam, I., Bathols, J., & Scott, J. K. (2012). CliMond: global high-resolution historical and future scenario climate surfaces for bioclimatic modelling. *Methods in Ecology and Evolution*, **3**(1), 53–64.
- Langley, C. H., Tobari, Y. N., & Kojima, K. I. (1974). Linkage disequilibrium in natural populations of *Drosophila melanogaster*. *Genetics*, **78**(3), 921–936.
- 585 Le Corre, V., & Kremer, A. (1998). Cumulative effects of founding events during colonisation on genetic diversity and differentiation in an island and stepping-stone model. *Journal of Evolutionary Biology*, **11**(4), 495–512.
- Lehe, R., Hallatschek, O., & Peliti, L. (2012). The rate of beneficial mutations surfing on the wave of a range expansion. *PLoS Computational Biology*, **8**(3), e1002447.
- 590 Linnen, C. R., Kingsley, E. P., Jensen, J. D., & Hoekstra, H. E. (2009). On the origin and spread of an adaptive allele in deer mice. *Science*, **325**(5944), 1095–1098.
- Li, X.-M., She, D.-Y., Zhang, D.-Y., & Liao, W.-J. (2015). Life history trait differentiation and local adaptation in invasive populations of *Ambrosia artemisiifolia* in China. *Oecologia*, **177**(3), 669–677.
- 595 Luikart, G., Allendorf, F. W., Cornuet, J. M., & Sherwin, W. B. (1998). Distortion of allele frequency distributions provides a test for recent population bottlenecks. *The Journal of Heredity*, **89**(3), 238–247.
- Lynch, M., Conery, J., & Burger, R. (1995). Mutation Accumulation and the Extinction of Small Populations. *The American Naturalist*, **146**(4), 489–518.
- 600 Marculis, N. G., Lui, R., & Lewis, M. A. (2017). Neutral Genetic Patterns for Expanding Populations with Nonoverlapping Generations. *Bulletin of Mathematical Biology*, **79**(4), 828–852.
- Mayr, E. (1963). *Animal species and evolution* (Vol. 797). Belknap Press of Harvard University Press Cambridge, Massachusetts.
- Menke, J. W. (1989). Management Controls on Productivity. In L. F. Huenneke & H. A. Mooney (Eds.), *Grassland structure and function: California annual grassland* (pp. 173–199). Dordrecht: Springer Netherlands.
- 605 Micheletti, S. J., & Storfer, A. (2015). A test of the central–marginal hypothesis using population genetics and ecological niche modelling in an endemic salamander (*Ambystoma barbouri*). *Molecular Ecology*, **24**(5), 967–979.
- 610 Moreau, C., Bhéler, C., Vézina, H., Jomphe, M., Labuda, D., & Excoffier, L. (2011). Deep human genealogies reveal a selective advantage to be on an expanding wave front. *Science*, **334**(6059), 1148–1150.
- Narum, S. R., Buerkle, C. A., Davey, J. W., Miller, M. R., & Hohenlohe, P. A. (2013). Genotyping-by-sequencing in ecological and conservation genomics. *Molecular Ecology*, **22**(11), 2841–2847.
- 615 Nei, M., Maruyama, T., & Chakraborty, R. (1975). The bottleneck effect and genetic variability in populations. *Evolution*, **29**(1), 1–10.
- Nei, M., & Li, W. H. (1979). Mathematical model for studying genetic variation in terms of restriction endonucleases. *Proceedings of the National Academy of Sciences of the United States of America*, **76**(10), 5269–5273.
- 620 Nordborg, M., Borevitz, J. O., Bergelson, J., Berry, C. C., Chory, J., Hagenblad, J., ... Weigel, D. (2002). The extent of linkage disequilibrium in *Arabidopsis thaliana*. *Nature Genetics*, **30**(2), 190–193.
- Ohta, T. (1992). The Nearly Neutral Theory of Molecular Evolution. *Annual Review of Ecology and Systematics*, **23**, 263–286.

- 625 Palstra, F. P., & Ruzzante, D. E. (2008). Genetic estimates of contemporary effective population size: what can they tell us about the importance of genetic stochasticity for wild population persistence? *Molecular Ecology*, **17**(15), 3428–3447.
- Peischl, S., Dupanloup, I., Kirkpatrick, M., & Excoffier, L. (2013). On the accumulation of deleterious mutations during range expansions. *Molecular Ecology*, **22**(24), 5972–5982.
- 630 Peischl, S., Kirkpatrick, M., & Excoffier, L. (2015). Expansion load and the evolutionary dynamics of a species range. *The American Naturalist*, **185**(4), E81–93.
- Peterson, B. K., Weber, J. N., Kay, E. H., Fisher, H. S., & Hoekstra, H. E. (2012). Double digest RADseq: an inexpensive method for de novo SNP discovery and genotyping in model and non-model species. *PloS One*, **7**(5), e37135.
- 635 Petitpierre, B., Kueffer, C., Broennimann, O., Randin, C., Daehler, C., & Guisan, A. (2012). Climatic niche shifts are rare among terrestrial plant invaders. *Science*, **335**(6074), 1344–1348.
- Phillips, B. L. (2012). Range shift promotes the formation of stable range edges. *Journal of Biogeography*, **39**(1), 153–161.
- Pierce, A. A., Zalucki, M. P., Bangura, M., Udawatta, M., Kronforst, M. R., Altizer, S., ... de Roode, J. C. (2014). Serial founder effects and genetic differentiation during worldwide range expansion of monarch butterflies. *Proceedings of the Royal Society of London B: Biological Sciences*, **281**(1797). <http://doi:10.1098/rspb.2014.2230>
- 640 Pironon, S., Villellas, J., Morris, W. F., Doak, D. F., & García, M. B. (2015). Do geographic, climatic or historical ranges differentiate the performance of central versus peripheral populations? *Global Ecology and Biogeography*, **24**(6), 611–620.
- 645 Pitcairn, M., Schoenig, S., Yacoub, R., & Gendron, J. (2006). Yellow starthistle continues its spread in California. *California Agriculture*, **60**(2), 83–90.
- Ramakrishnan, A. P., Musial, T., & Cruzan, M. B. (2010). Shifting dispersal modes at an expanding species' range margin. *Molecular Ecology*, **19**(6), 1134–1146.
- 650 Reeve Morghan, K. J. R., & Rice, K. J. (2006). Variation in resource availability changes the impact of invasive thistles on native bunchgrasses. *Ecological Applications*, **16**(2), 528–539.
- Remington, D. L., Thornsberry, J. M., Matsuoka, Y., Wilson, L. M., Whitt, S. R., Doebley, J., ... Buckler, E. S., 4th. (2001). Structure of linkage disequilibrium and phenotypic associations in the maize genome. *Proceedings of the National Academy of Sciences of the United States of America*, **98**(20), 11479–11484.
- 655 Rice, K. J., & Mack, R. N. (1991). Ecological genetics of *Bromus tectorum*. *Oecologia*, **88**(1), 91–101.
- Rius, M., & Darling, J. A. (2014). How important is intraspecific genetic admixture to the success of colonising populations? *Trends in Ecology & Evolution*, **29**(4), 233–242.
- Robertson, A. (1960). A Theory of Limits in Artificial Selection. *Proceedings of the Royal Society of London B: Biological Sciences*, **153**(951), 234–249.
- 660 Sagarin, R. D., & Gaines, S. D. (2002). The “abundant centre” distribution: to what extent is it a biogeographical rule? *Ecology Letters*, **5**(1), 137–147.
- Sexton, J. P., McIntyre, P. J., Angert, A. L., & Rice, K. J. (2009). Evolution and Ecology of Species Range Limits. *Annual Review of Ecology, Evolution, and Systematics*, **40**, 415–436.
- 665 Shrimpton, J. M., & Heath, D. D. (2003). Census vs. effective population size in chinook salmon: large- and small-scale environmental perturbation effects. *Molecular Ecology*, **12**(10), 2571–2583.
- Slatkin, M., & Excoffier, L. (2012). Serial founder effects during range expansion: a spatial analog of genetic drift. *Genetics*, **191**(1), 171–181.
- 670 Slotte, T., Foxe, J. P., Hazzouri, K. M., & Wright, S. I. (2010). Genome-wide evidence for efficient positive and purifying selection in *Capsella grandiflora*, a plant species with a large effective population size. *Molecular Biology and Evolution*, **27**(8), 1813–1821.
- Strasburg, J. L., Kane, N. C., Raduski, A. R., Bonin, A., Michelmore, R., & Rieseberg, L. H. (2011). Effective population size is positively correlated with levels of adaptive divergence among annual sunflowers. *Molecular Biology and Evolution*, **28**(5), 1569–1580.

- 675 Stromberg, M. R., & Griffin, J. R. (1996). Long-term patterns in coastal California grasslands in relation to cultivation, gophers, and grazing. *Ecological Applications*, **6**(4), 1189–1211.
- Swope, S. M., Satterthwaite, W. H., & Parker, I. M. (2017). Spatiotemporal variation in the strength of density dependence: implications for biocontrol of *Centaurea solstitialis*. *Biological Invasions*, **19**(9), 2675–2691.
- 680 Sung, W., Ackerman, M. S., Miller, S. F., Doak, T. G., & Lynch, M. (2012). Drift-barrier hypothesis and mutation-rate evolution. *Proceedings of the National Academy of Sciences of the United States of America*, **109**(45), 18488–18492.
- Szűcs, M., Melbourne, B. A., Tuff, T., Weiss-Lehman, C., & Hufbauer, R. A. (2017a). Genetic and demographic founder effects have long-term fitness consequences for colonising populations. *Ecology Letters*, **20**(4), 436–444.
- 685 Szűcs, M., Vahsen, M. L., Melbourne, B. A., Hoover, C., Weiss-Lehman, C., & Hufbauer, R. A. (2017b). Rapid adaptive evolution in novel environments acts as an architect of population range expansion. *Proceedings of the National Academy of Sciences of the United States of America*, **114**(51), 13501–13506.
- Tingley, R., Vallinoto, M., Sequeira, F., & Kearney, M. R. (2014). Realized niche shift during a global biological invasion. *Proceedings of the National Academy of Sciences of the United States of America*, **111**(28), 10233–10238.
- 690 Turner, T. F., Wares, J. P., & Gold, J. R. (2002). Genetic effective size is three orders of magnitude smaller than adult census size in an abundant, Estuarine-dependent marine fish (*Sciaenops ocellatus*). *Genetics*, **162**(3), 1329–1339.
- 695 Uller, T., & Leimu, R. (2011). Founder events predict changes in genetic diversity during human-mediated range expansions. *Global Change Biology*, **17**(11), 3478–3485.
- Uygur, S., Smith, L., Uygur, F. N., Cristofaro, M., & Balciunas, J. (2004). Population densities of yellow starthistle (*Centaurea solstitialis*) in Turkey. *Weed Science*, **52**(5), 746–753.
- 700 Varvio, S. L., Chakraborty, R., & Nei, M. (1986). Genetic variation in subdivided populations and conservation genetics. *Heredity*, **57**, 189–198.
- Vandepitte, K., de Meyer, T., Helsen, K., van Acker, K., Roldán-Ruiz, I., Mergeay, J., & Honnay, O. (2014). Rapid genetic adaptation precedes the spread of an exotic plant species. *Molecular Ecology*, **23**(9), 2157–2164.
- 705 Wang, J. (2016). A comparison of single-sample estimators of effective population sizes from genetic marker data. *Molecular Ecology*, **25**(19), 4692–4711.
- Wang, X.-Q., Huang, Y., & Long, C.-L. (2013). Assessing the genetic consequences of flower-harvesting in *Rhododendron decorum* Franchet (Ericaceae) using microsatellite markers. *Biochemical Systematics and Ecology*, **50**, 296–303.
- 710 Waples, R. S. (2006). A bias correction for estimates of effective population size based on linkage disequilibrium at unlinked gene loci. *Conservation Genetics*, **7**(2), 167–184.
- Waples, R. S. (2016). Making sense of genetic estimates of effective population size. *Molecular Ecology*, **25**(19), 4689–4691.
- Waples, R. S., & Do, C. (2008). Idne: a program for estimating effective population size from data on linkage disequilibrium. *Molecular Ecology Resources*, **8**(4), 753–756.
- 715 Webb, D. M., & Knapp, S. J. (1990). DNA extraction from a previously recalcitrant plant genus. *Plant Molecular Biology Reporter*, **8**(3), 180–185.
- Welles, S. R., & Dlugosch, K. M. (2018). Population Genomics of Colonization and Invasion (Vol. 17, p. 24). Cham: Springer International Publishing.
- 720 White, T. A., Perkins, S. E., Heckel, G., & Searle, J. B. (2013). Adaptive evolution during an ongoing range expansion: the invasive bank vole (*Myodes glareolus*) in Ireland. *Molecular Ecology*, **22**(11), 2971–2985.
- Widmer, T. L., Guermache, F., Dolgovskaia, M. Y., & Reznik, S. Y. (2007). Enhanced Growth and Seed Properties in Introduced Vs. Native Populations of Yellow Starthistle (*Centaurea Solstitialis*). *Weed Science*, **55**(5), 465–473.



- 725 Willi, Y., Fracassetti, M., Zoller, S., & Van Buskirk, J. (2018). Accumulation of mutational load at the  
edges of a species range. *Molecular Biology and Evolution*. doi:10.1093/molbev/msy003  
Wootton, J. T., & Pfister, C. A. (2015). Processes affecting extinction risk in the laboratory and in nature.  
730 *Proceedings of the National Academy of Sciences of the United States of America*, **112**(44), E5903.  
Wright, S. (1931). Evolution in Mendelian Populations. *Genetics*, **16**(2), 97–159.  
Wright, S. (1938). Size of population and breeding structure in relation to evolution. *Science*, **87**(2263),  
430–431.

**Acknowledgements** We thank # reviewers for helpful comments on previous versions of this  
735 manuscript, and MS Barker for computational assistance. This study was supported by a USDA  
ELI Fellowship #2017-67011-26034 to JEB, the National Institute of General Medical Sciences  
of the NIH under Award #K12GM000708 through the University of Arizona Center for Insect  
Science to BSB, and USDA grant #2015-67013-23000 to KMD. The content is solely the  
responsibility of the authors and does not necessarily represent the official views of the National  
740 Institutes of Health. All authors declare no conflict of interests.

**Data Accessibility** All data files to be made accessible online (e.g. via Dryad)

**Author Contributions** JB and KMD conceived the study; JB and BSB performed the analyses;  
745 JB, BSB, and KMD wrote the paper.

750

755

760

## Tables and Figures

765 **Table 1.** Individual effects for the best fit linear model explaining rarefied effective population size ( $N_e$ )  
in invading populations of *C. solstitialis*, as a function of climatic principal component variables (PC1,  
PC2) and population age (Age).

| <b>Effect</b> | <b>Coefficient</b> | <b>Standard Error</b> | <b>t-value</b> | <b>p-value</b> | <b>Effect Size</b> |
|---------------|--------------------|-----------------------|----------------|----------------|--------------------|
| PC1           | 1.45               | 0.483                 | -0.66          | 0.528          | 0.052              |
| PC2           | -0.39              | 0.438                 | 2.50           | 0.011          | 0.579              |
| Age           | 0.03               | 0.012                 | 3.31           | 0.037          | 0.439              |

770

775

780

785

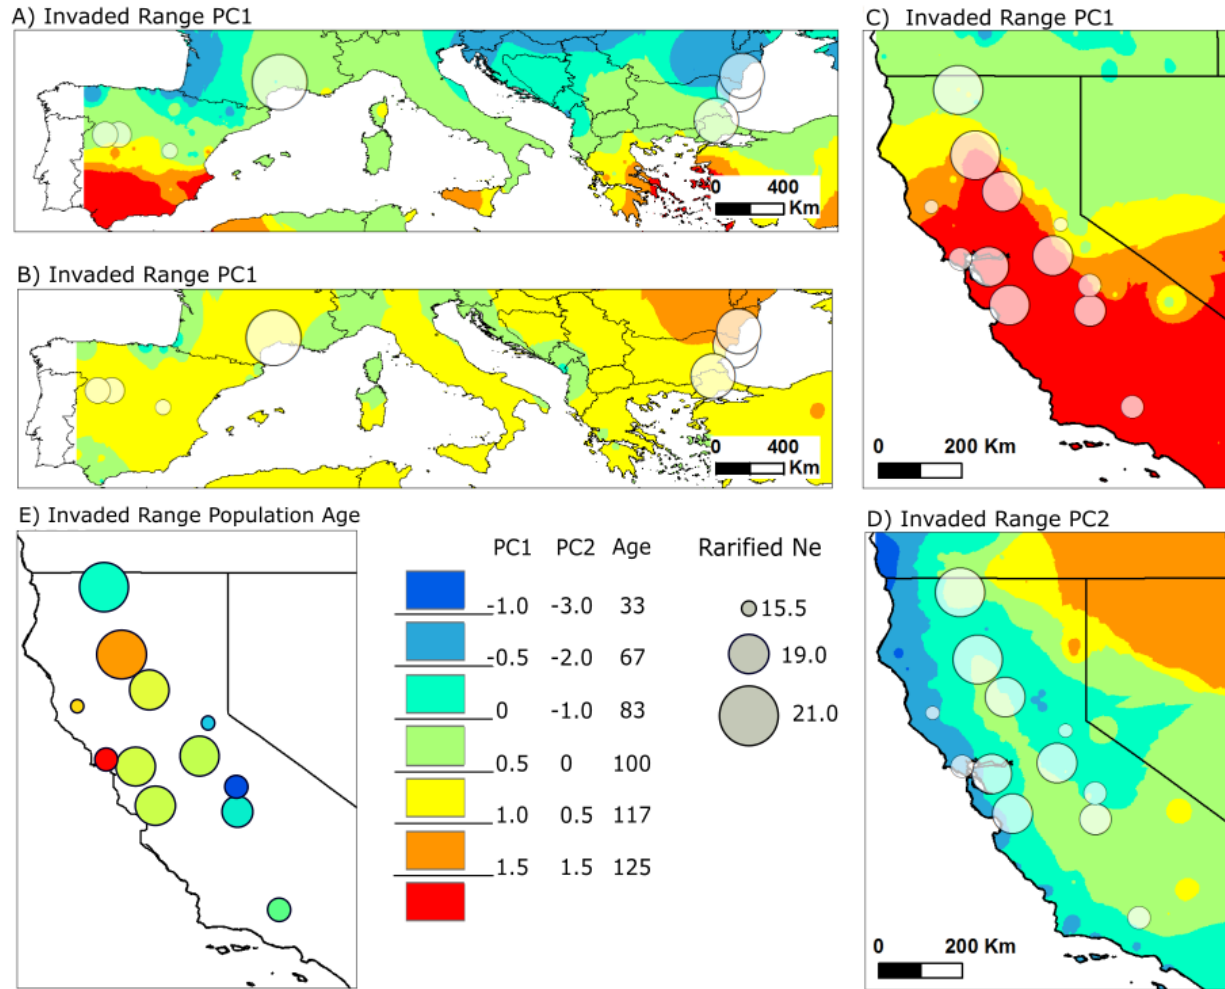

**Fig 1.** The distribution of rarefied  $N_e$ , climatic principal component (PC) gradients, and population age across *C. solstitialis* populations in Eurasia and California. In all panels, circles indicate sampled populations with a diameter proportional to  $N_e$ . PC1 is positively correlated with annual temperature and temperature of the driest quarter and negatively correlated with seasonal differences in total radiation in the native (a) and invaded (c) ranges. PC2 is positively correlated with seasonal differences in temperature and negatively correlated with annual precipitation and seasonal differences in precipitation in the native (b) and invaded (d) ranges. In the California invasion, population age (e) reflects a history of expansion beginning in the San Francisco Bay area and expanding first to the North and then to the South and East of the state.

800

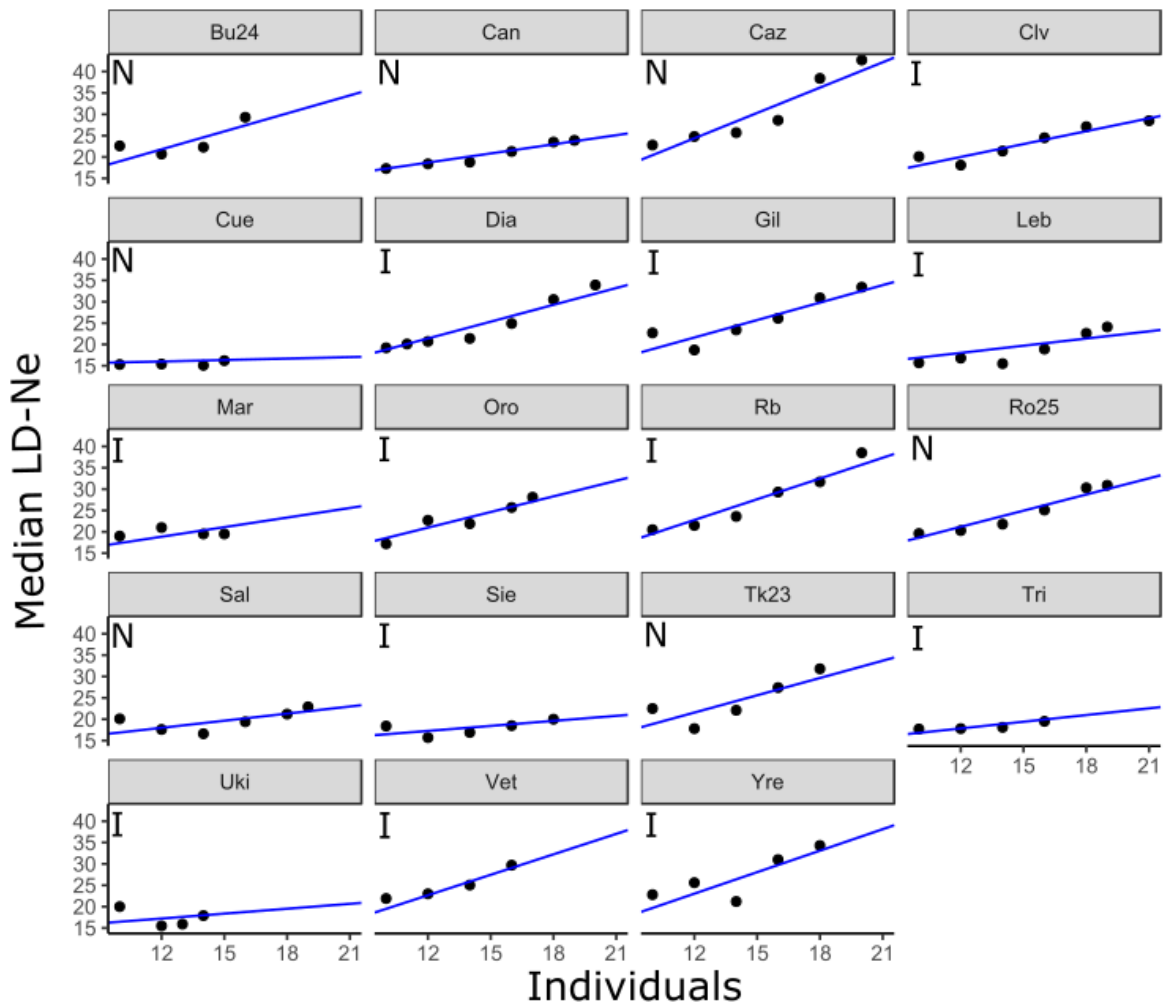

805 **Fig 2.** Rarefied relationships for the number of subsampled individuals and median values of LD- $N_e$ . Rarefaction was performed by linear mixed model with random slopes and intercepts. N- Native populations; I- Invading populations.

810

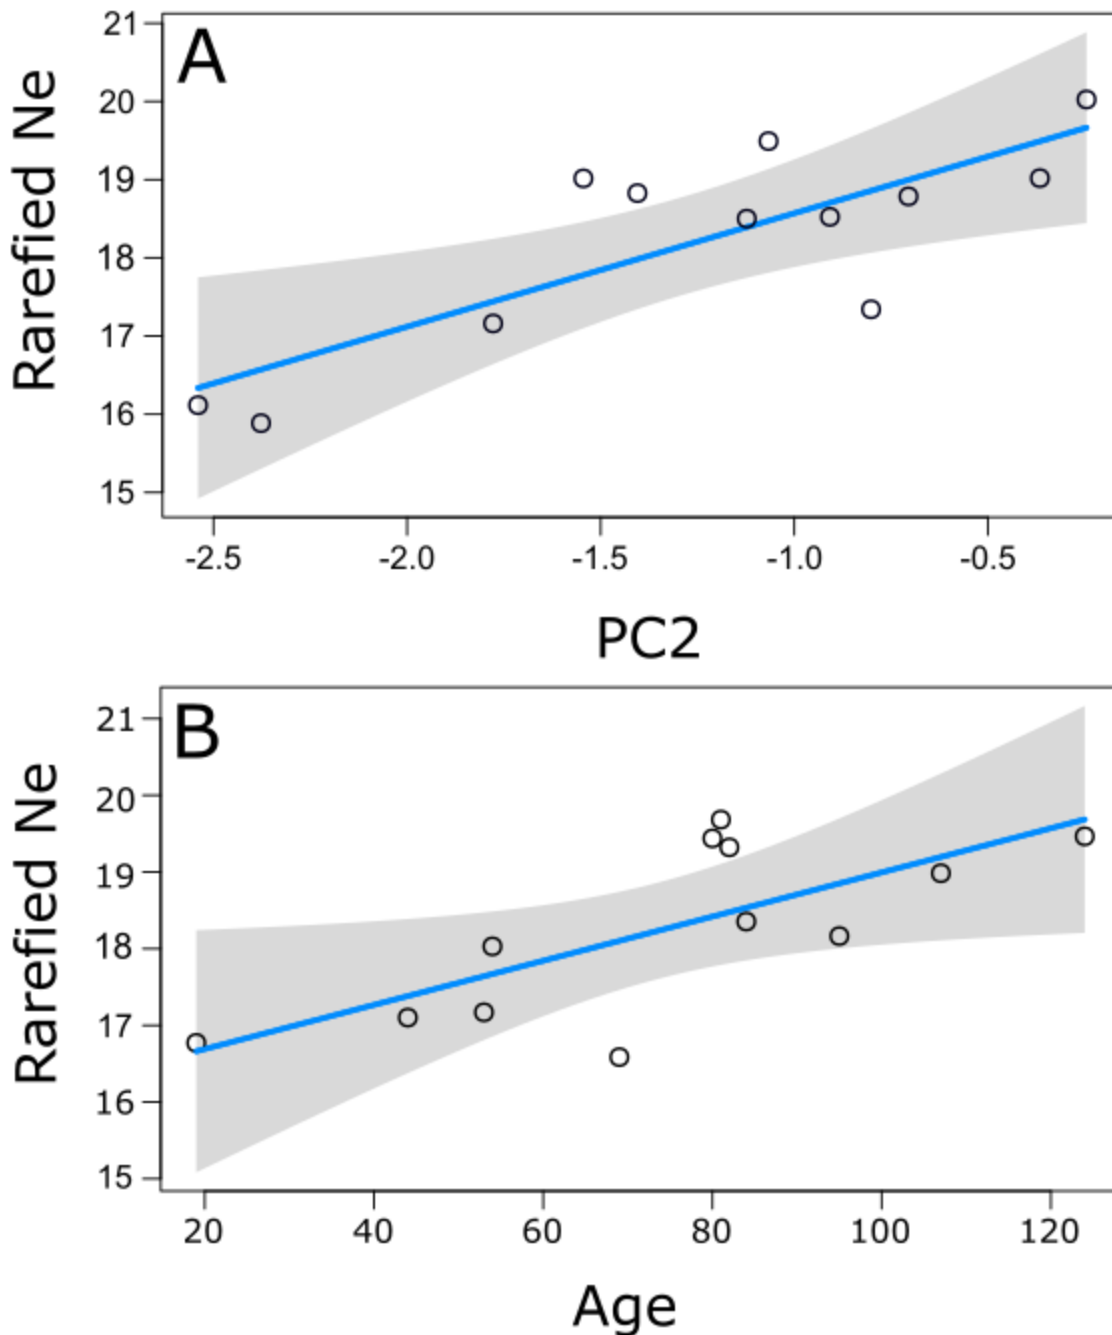

815

**Fig 3.** Rarefied  $N_e$  values are predicted by climatic variables and population age in invading *C. solstitialis* populations. The second principal component (PC2) of climatic variability, for which larger values represent lower annual precipitation and greater seasonality in temperature, is significantly correlated with rarefied  $N_e$  (A;  $P=0.011$ ) as is estimated population age (B;  $P=0.037$ ). Lines show linear model fits and shading indicates the 95% confidence interval. Points represent partial residuals after taking into account other variables in the linear model.

820

## **SUPPORTING INFORMATION**

825 Supporting information is included as a single PDF document
